# Supplementary material
Source: PubMed Central journal article supplement (PMC6785982)

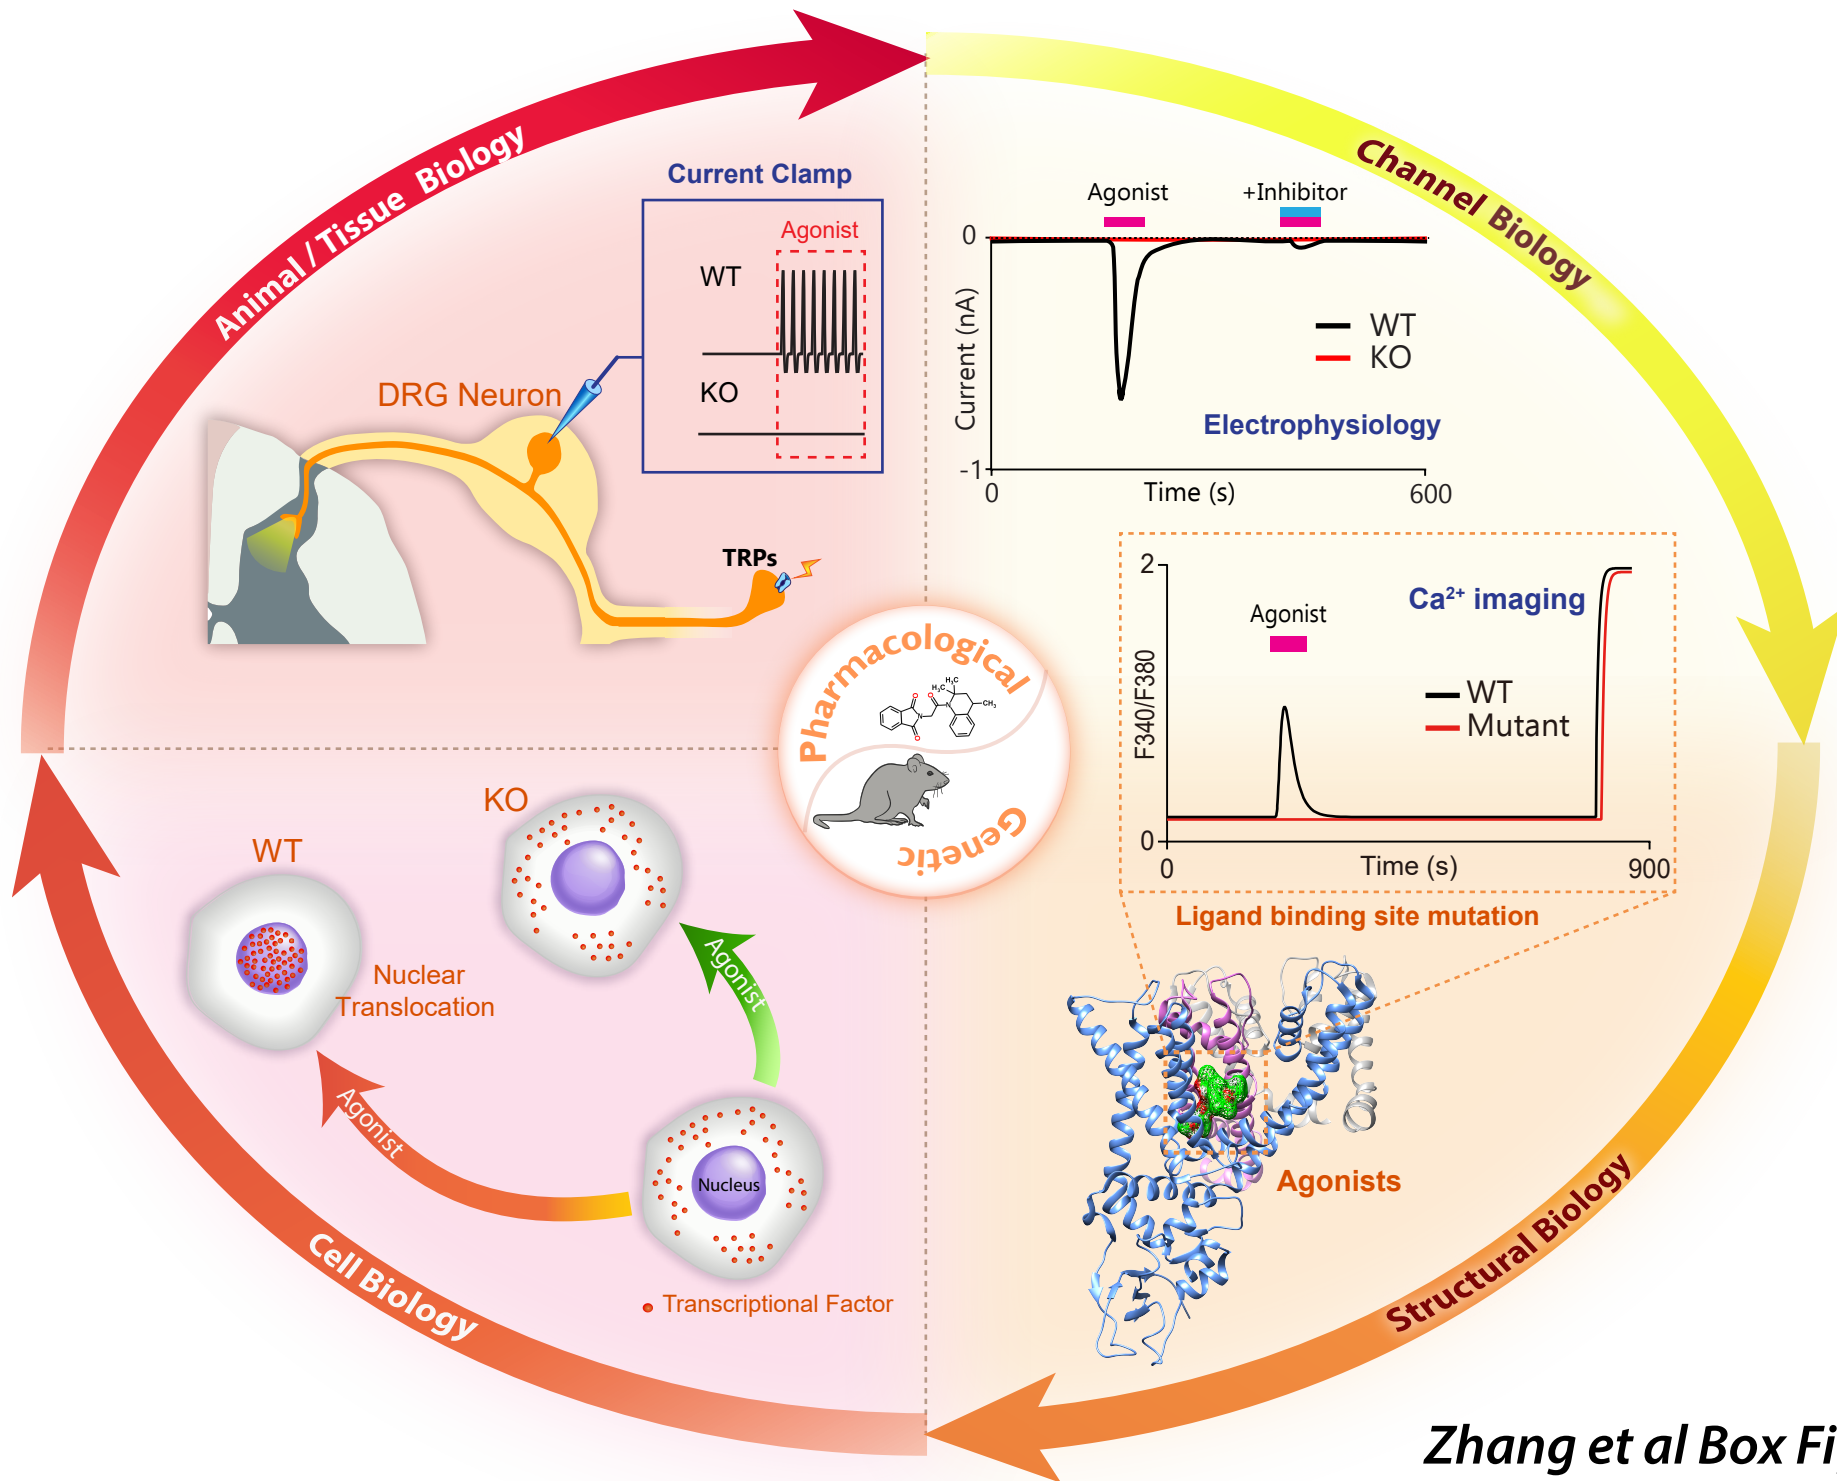

Zhang et al Box Fig. 1

Supplement: NIHMS1052806-supplement-box_figure.pdf [file NIHMS1052806-supplement-box_figure.pdf]
